# Supplementary material for: Effects of artemisinin on ventricular arrhythmias in response to left ventricular afterload increase and microRNA expression profiles in Wistar rats
Source: PeerJ. 2018 Dec 20;6:e6110. doi: 10.7717/peerj.6110 (PMC6304267; doi:10.7717/peerj.6110)
Supplement: Supplemental Information 2 — Each data indicates PR intervals of every group. [file peerj-06-6110-s002.xlsx]

## Sheet: Sheet1
group	PR internal
1	49.2
1	45.12
1	46.96
1	49.98
1	48.52
1	50.37
1	56.65
1	53.21
1	53.84
1	46.12
2	52.41
2	52.09
2	56.16
2	48.67
2	47.78
2	57.02
2	45.31
2	44.82
2	47.53
2	50.2
3	52.68
3	45.45
3	54.71
3	40.94
3	55.6
3	48.53
3	52.22
3	50.74
3	49.02
3	53.81
4	44.35
4	56.4
4	48.24
4	55.95
4	49.12
4	47.86
4	55.51
4	48.26
4	49.35
4	47.96
5	53.51
5	47.81
5	46.21
5	47.96
5	49.25
5	49.8
5	54.14
5	50.75
5	56.61
5	46.61
6	50.03
6	49.04
6	48.65
6	54.7
6	54.17
6	51.91
6	52.65
6	48.43
6	56.58
6	52.76
7	55.11
7	54.4
7	59.75
7	57.76
7	53.58
7	55.95
7	50.22
7	56.84
7	57.58
7	61.89
