# Supplementary material for: Effects of artemisinin on ventricular arrhythmias in response to left ventricular afterload increase and microRNA expression profiles in Wistar rats
Source: PeerJ. 2018 Dec 20;6:e6110. doi: 10.7717/peerj.6110 (PMC6304267; doi:10.7717/peerj.6110)
Supplement: Supplemental Information 3 — Each data indicates the QTc internal of every rat. [file peerj-06-6110-s003.xlsx]

## Sheet: Sheet1
group	QTc internal（ms）
1	120	140
1	126	146
1	123.9	143.9
1	132.6	152.6
1	124.1	144.1
1	134.7	154.7
1	125	145
1	120.7	140.7
1	133.5	153.5
1	133.4	153.4
2	117.5	137.5
2	127.5	147.5
2	129.5	149.5
2	122.6	142.6
2	127.1	147.1
2	122.3	142.3
2	135.9	155.9
2	138.2	158.2
2	118	138
2	128.6	148.6
3	126.8	146.8
3	130.3	150.3
3	132.8	152.8
3	115.3	135.3
3	132.5	152.5
3	132.5	152.5
3	129.7	149.7
3	139.7	159.7
3	131.2	151.2
3	122.6	142.6
4	120.5	140.5
4	133.8	153.8
4	118.6	138.6
4	122.1	142.1
4	121	141
4	135.3	155.3
4	126.9	146.9
4	121.7	141.7
4	129.3	149.3
4	119.6	139.6
5	129.53	149.53
5	120.5	140.5
5	127.1	147.1
5	126.7	146.7
5	129.5	149.5
5	112.3	132.3
5	129	149
5	119.3	139.3
5	122.8	142.8
5	126.1	146.1
6	116.2	136.2
6	129.4	149.4
6	131.9	151.9
6	122.2	142.2
6	136.4	156.4
6	127.2	147.2
6	128.9	148.9
6	121.9	141.9
6	113.6	133.6
6	131.8	151.8
7	128.7	148.7
7	128.7	148.7
7	129	149
7	114.98	134.98
7	126.9	146.9
7	111.2	131.2
7	118.6	138.6
7	138.7	158.7
7	110.4	130.4
7	134.5	154.5
